# Supplementary material
Source: PubMed Central journal article supplement (PMC5836139)
Supplement: 10.1074_M117.809004_jbc.M117.809004-2.pdf [file 10.1074_M117.809004_jbc.M117.809004-2.pdf]

-Ade affter Cu

N-PrP90-230

Vector

N

N-A $\beta$ 1-42

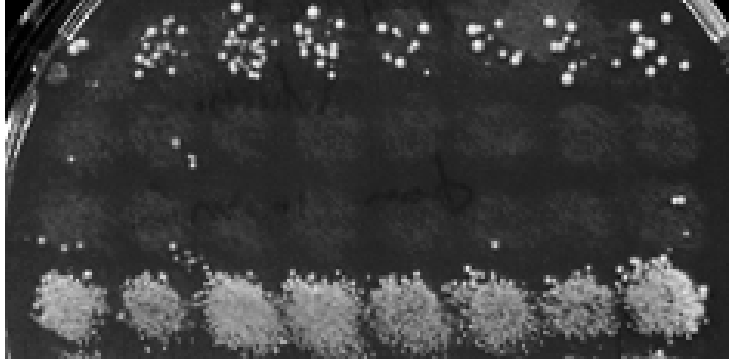

**Figure S2. [*PSI<sup>+</sup>*] induction in the [*pin<sup>-</sup>*] yeast strain by the Sup35N-PrP and Sup35N-A $\beta$  chimeric constructs.** Expression of chimeric constructs was induced by 100  $\mu$ M CuSO<sub>4</sub>, followed by velveteen replica plating onto –Ade medium without additional copper, as described in Experimental Procedures. [*PSI<sup>+</sup>*] was detected by growth on –Ade. A portion of this plate is shown in Fig 2B.
