# Supplementary material
Source: PubMed Central journal article supplement (PMC5836139)
Supplement: 10.1074_M117.809004_jbc.M117.809004-3.pdf [file 10.1074_M117.809004_jbc.M117.809004-3.pdf]

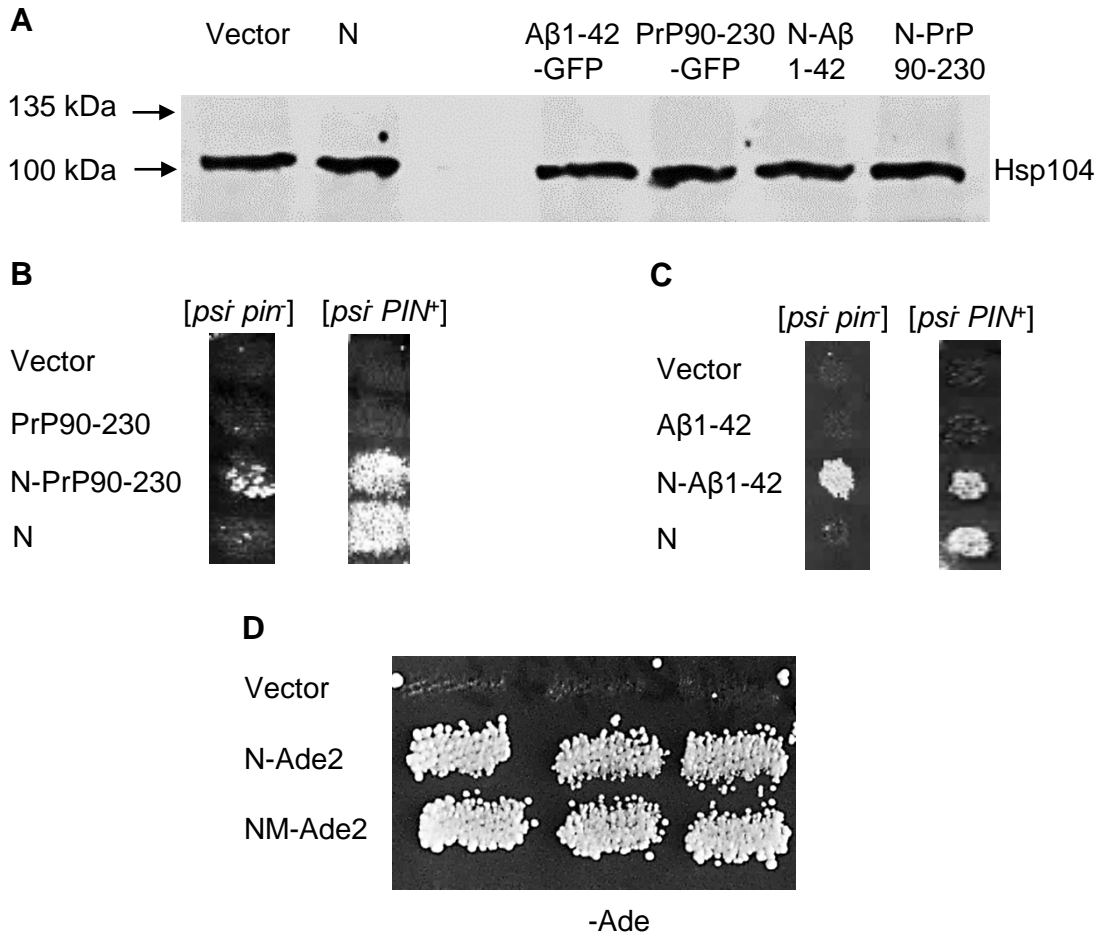

**Figure S3. Additional characterization of chimeric constructs in yeast.** (A) Lack of Hsp104 induction by chimeric constructs. Cultures were grown in the synthetic medium selective for the plasmids. Expression of a respective chimeric construct (as indicated) was induced with the addition of 100  $\mu$ M CuSO<sub>4</sub>. Proteins were isolated and run on SDS-PAGE, followed by Western blotting and reaction to the anti-Hsp104 antibody. Protein levels were normalized using Bradford assay (BioRad). (B) and (C) [*PSI*<sup>+</sup>] induction by chimeric constructs, bearing PrP90-230 (B) or A $\beta$ 1-42 (C), in various prion backgrounds. [*PSI*<sup>+</sup>] formation is detected on -Ade medium after transient overproduction of respective constructs from the *P*<sub>CUP1</sub> promoter, induced by addition of 100  $\mu$ M CuSO<sub>4</sub>. (D) Functionality of the Ade2-based chimeric constructs. Plasmids expressing the Sup35N-Ade2 and Sup35NM-Ade2 constructs compensate for the growth of a yeast strain, bearing the *ade2* mutant allele, on the medium lacking adenine.
