# Supplementary material
Source: PubMed Central journal article supplement (PMC5836139)
Supplement: 10.1074_M117.809004_jbc.M117.809004-5.pdf [file 10.1074_M117.809004_jbc.M117.809004-5.pdf]

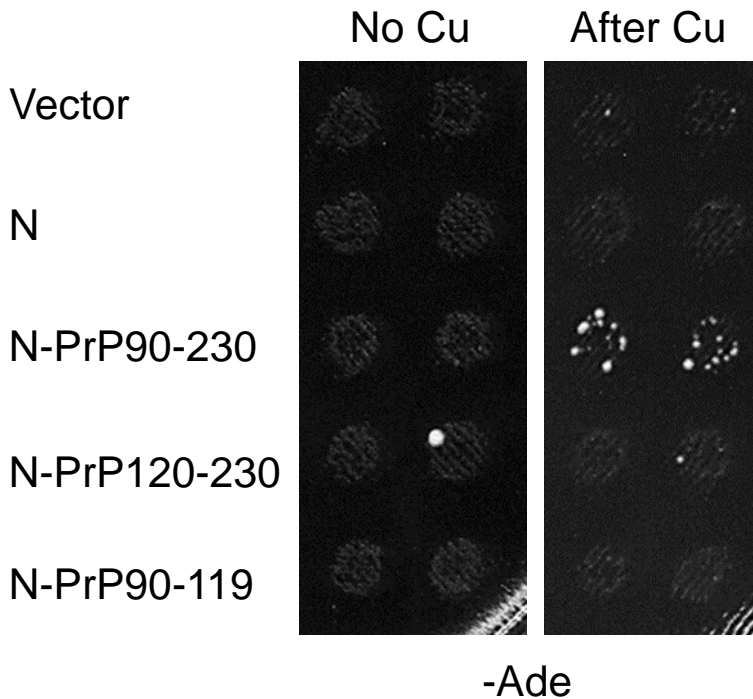

**Figure S5. Lack of  $[PSI^+]$  nucleation by Sup35N-PrP90-119 chimera in the yeast  $[pin^-]$  strain.** Images from  $-Ade$  plates are shown, obtained without (left column) or with (right column) pre-incubation in the presence of additional (100  $\mu$ M)  $CuSO_4$ . Sup35N-PrP90-230 (capable of nucleating  $[PSI^+]$ ) and Sup35N-PrP120-230 (not capable of nucleating  $[PSI^+]$ ) constructs, as well as Sup35N (negative control) are included for the comparison.
