# Supplementary material
Source: PubMed Central journal article supplement (PMC5836139)
Supplement: 10.1074_M117.809004_jbc.M117.809004-6.pdf [file 10.1074_M117.809004_jbc.M117.809004-6.pdf]

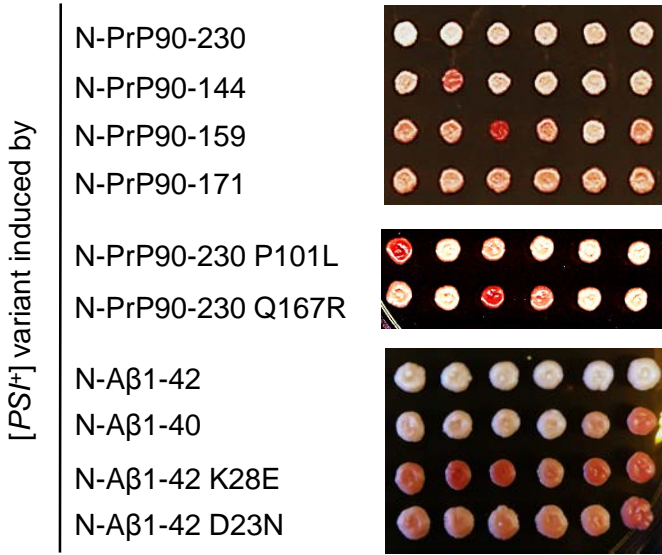

**Figure S6. Comparison of a sample of [PS<sup>+</sup>] isolates, induced by various Sup35N-PrP- or Sup35N-Aβ-based chimeric constructs in yeast.** Independent [PS<sup>+</sup>] isolates nucleated by different inducing constructs are compared by color on YPD medium after the loss of inducing plasmid. Distribution of [PS<sup>+</sup>] isolates by phenotype is shown in Fig 8B and Table S1.
