# Supplementary material
Source: PubMed Central journal article supplement (PMC5836139)
Supplement: 10.1074_M117.809004_jbc.M117.809004-8.pdf [file 10.1074_M117.809004_jbc.M117.809004-8.pdf]

**Table S2.** Yeast strains used in this study

| <b>Strain name</b>      | <b>Prion background</b>                             | <b>Genotype</b>                                                         |
|-------------------------|-----------------------------------------------------|-------------------------------------------------------------------------|
| GT81-1C                 | [ <i>PSI</i> <sup>+</sup> <i>PIN</i> <sup>+</sup> ] | <i>MATa ade1-14 his3 leu2-3,112 lys2 trp1 ura3-52</i>                   |
| GT81-1D                 | [ <i>PSI</i> <sup>+</sup> <i>PIN</i> <sup>+</sup> ] | <i>MATα ade1-14 his3 leu2-3,112 lys2 trp1 ura3-52</i>                   |
| GT409                   | [ <i>psi</i> <sup>-</sup> <i>pin</i> <sup>-</sup> ] | <i>MATa ade1-14 his3 leu2-3,112 lys2 trp1 ura3-52</i>                   |
| GT159                   | [ <i>psi</i> <sup>-</sup> <i>PIN</i> <sup>+</sup> ] | <i>MATa ade1-14 his3 leu2-3,112 lys2 trp1 ura3-52</i>                   |
| GT564                   | [ <i>psi</i> <sup>-</sup> <i>pin</i> <sup>-</sup> ] | <i>MATa ade1-14 his3 leu2-3,112 lys2 trp1 ura3-52<br/>rnq1Δ::HIS3Sp</i> |
| GT197                   | [ <i>psi</i> <sup>-</sup> <i>pin</i> <sup>-</sup> ] | <i>MATα ade1-14 his3 leu2-3,112 lys2 trp1 ura3-52</i>                   |
| GT17                    | [ <i>psi</i> <sup>-</sup> <i>pin</i> <sup>-</sup> ] | <i>MATa ade1-14 his3 leu2 trp1 ura3-52</i>                              |
| 33G-D373                | [ <i>psi</i> <sup>-</sup> <i>pin</i> <sup>-</sup> ] | <i>MATα ade2-144 717 his7 lys9 pha2 trp1 ura3-52<br/>leu2-3,112</i>     |
| OT56<br>(ψ+1-1-74-D694) | [ <i>PSI</i> <sup>+</sup> <i>PIN</i> <sup>+</sup> ] | <i>MATa ade1-14 his3-Δ200 leu2-3,112 trp1-289<br/>ura3-52</i>           |
| OT55<br>(ψ+7-74-D694)   | [ <i>PSI</i> <sup>+</sup> <i>PIN</i> <sup>+</sup> ] | <i>MATa ade1-14 his3-Δ200 leu2-3,112 trp1-289<br/>ura3-52</i>           |
