# Supplementary material
Source: PubMed Central journal article supplement (PMC5836139)
Supplement: 10.1074_M117.809004_jbc.M117.809004-10.pdf [file 10.1074_M117.809004_jbc.M117.809004-10.pdf]

**Table S4.** Oligonucleotide primers used in this study

| <b>Name</b>          | <b>Sequence 5'-3'</b>                                               | <b>Direction</b> |
|----------------------|---------------------------------------------------------------------|------------------|
| Sup35N BamHI         | GCGTGGATCCGTCGCCACCATGTCC                                           | Forward          |
| Sup35N SacI          | TTGGAGCTCTTATCAACCTTGAGACTGTGGTTGGAA                                | Reverse          |
| Sup35N-HA XbaI       | AGTCTCTAGATCAAGCGTAATCTGGTACGTCGTATGG<br>GTAACC TTGAGACTGTGGTTGGAA  | Reverse          |
| PrP90-230-HA XbaI    | AGTCTCTAGATCAAGCGTAATCTGGTACGTCGTATGG<br>GTAGGA TCTTCTCCCGTCGTAATA  | Reverse          |
| PrP90-119 XbaI       | GC TCT AGA TTA TGC CCC AGC TGC CGC AGC                              | Reverse          |
| N-PrP90-144 XbaI     | TAATTCTAGATCAGTCGTTGCCAAAATGGATC                                    | Reverse          |
| PrP90-159 XbaI       | TAATTCTAGATCATTGGTTAGGGTAGCGGTACATG                                 | Reverse          |
| PrP90-171 XbaI       | TAATTCTAGATCACTGGTTGCTGTACTGATCCACTGG                               | Reverse          |
| PrP90-230 P101L      | CAGTGGAACAAGCTCAGCAAACCAAAAACC                                      | Forward          |
| PrP90-230 P101L      | GGTTTTTGGTTTGCTGAGCTTGTTCCACTG                                      | Reverse          |
| PrP90-230 Q167R      | CAGGCCAGTGGATCGATACAGCAACCAGAAC                                     | Forward          |
| PrP90-230 Q167R      | GTTCTGGTTGCTGTATCGATCCACTGGCCTG                                     | Reverse          |
| A $\beta$ 1-42-EcoRI | CAAGAATTCGATGCAGAATTCGGACATGAC                                      | Forward          |
| A $\beta$ 1-42 NotI  | TTGGCGGCCGCTTACGCTATGACAACACCGCC                                    | Reverse          |
| A $\beta$ 1-42 XbaI  | TTGTCTAGATTACGCTATGACAACACCGCC                                      | Reverse          |
| EcoRI-NAC            | GACTGAATTCGAGCAAGTAACTAATGTAGGT                                     | Forward          |
| NAC-HA NotI          | AGTCGCGGCCGCTCAAGCGTAATCTGGTACGTCGTA<br>TGGGTAACCAGTAGCCGCTGCAATGGA | Reverse          |
| EcoRI 23-230 PrP     | TGG GAA TTC AAA AAG CGG CCA AAG CCT GG                              | Forward          |
| A $\beta$ 1-40 XbaI  | AGTCTCTAGATTAGACAACACCGCCCACCATGAG                                  | Reverse          |

Chandramowlishwaran et al  
Nucleation of a yeast prion by mammalian proteins

|                     |                                                       |         |
|---------------------|-------------------------------------------------------|---------|
| EcoRI IAPP          | GCGTGAATTCGCCACACAAAGATTGGCTAAT                       | Forward |
| NotI IAPP           | AGTCGCGGCCGCTCAGTAAGTGTTACTACCAAC                     | Reverse |
| A $\beta$ 1-42 K28E | CAGAAGATGTGGGTTCAAACGAGGGTGCAATCATTG<br>GACTCAT       | Forward |
| A $\beta$ 1-42 K28E | ATGAGTCCAATGATTGCACCCTCGTTTGAACCCAATC<br>TTCTG        | Reverse |
| A $\beta$ 1-42 D23N | CAAAAATTGGTGTCTTTGCAGAAAATGTGGGTTCAA<br>ACAAAGGTGCAA  | Forward |
| A $\beta$ 1-42 D23N | TTGCACCTTTGTTTGAACCCACATTTTCTGCAAAGAAC<br>ACCAATTTTTG | Reverse |
| A $\beta$ 1-42 F19S | CATCAAAAATTGGTGTCTTTGCAGAAGATGTGG                     | Forward |
| A $\beta$ 1-42 F19S | CCACATCTTCTGCAAAGGACACCAATTTTTGATG                    | Reverse |
| A $\beta$ 1-42 F20S | CAAAAATTGGTGTCTCTGCAGAAGATGTGGG                       | Forward |
| A $\beta$ 1-42 F20S | CCCACATCTTCTGCAGAGAACACCAATTTTTG                      | Reverse |
| A $\beta$ 1-42 I31P | GTTCAAACAAAGGTGCACCCATTGGACTCATGGTGG                  | Forward |
| A $\beta$ 1-42 I31P | CCACCATGAGTCCAATGGGTGCACCTTTGTTTGAAC                  | Reverse |
| EcoRI LacZ          | GCGTGAATTCATGGATCCCGTCGTTTTACAACGTCGT<br>GAC          | Forward |
| LacZ XbaI           | GACTTCTAGATTATTTTTGACACCAGACCAACTGGTA<br>ATG          | Reverse |
| Sup35N SacII        | GACTCCGCGGACCTTGAGACTGTGGTTGGAAACCAGC<br>TTG          | Reverse |
